# Supplementary material
Source: MDPI journal article supplement (https://www.mdpi.com/2073-4433/13/1/97)
Supplement: s1 [file s1]

---

# **Supplementary Materials: Assessment of COVID-19 Lockdown Impact on the Air Quality in Eastern Spain: PM and BTX in Urban, Suburban and Rural Sites Exposed to Different Emissions**

Milagros Ródenas, Rubén Soler, Esther Borrás, Teresa Vera, José Jaime Diéguez and Amalia Muñoz\*

**Table S1.** Summary of AQCs considered in this work and environmental and pollutant data reported.

| STATION<br>NUMBER | ABB  | NAME        | PROVINCE  | LATITUDE / LONGITUDE       | ENVIRONMENT<br>TYPE | EMISSIONS<br>TYPE | SITE | PM <sub>10</sub> and<br>PM <sub>2.5</sub> | BTX | TEMP | RH | RF | RAD | WS & WD |
|-------------------|------|-------------|-----------|----------------------------|---------------------|-------------------|------|-------------------------------------------|-----|------|----|----|-----|---------|
| 1                 | ALC2 | L'ALCORA    | Castellon | 40°4'4.90"N 0°12'23.71"W   | URB                 | IND               | COA  | X                                         |     | X    | X  | X  | X   | X       |
| 2                 | ALGA | ALGAR       | Valencia  | 39°46'56.46"N 0°21'33.08"W | RUR                 | BK                | COA  | X                                         |     |      |    |    |     |         |
| 3                 | ALM2 | ALMASSORA   | Castellon | 39°56'39.05"N 0°3'26.54"W  | URB                 | IND               | COA  | X                                         |     |      |    |    |     | X       |
| 4                 | BENC | BENICASSIM  | Castellon | 40°3'39.87"N 0°4'18.01"E   | SUB                 | IND               | COA  | X                                         |     |      |    |    |     |         |
| 5                 | BURR | BURRIANA    | Castellon | 39°54'27.90"N 0°3'58.35"W  | RUR                 | IND               | COA  | X                                         |     | X    | X  | X  | X   | X       |
| 6                 | CAUD | CAUDETE     | Valencia  | 39°33'35.73"N 1°16'58.11"W | RUR                 | BK                | INN  | X                                         |     |      |    |    |     |         |
| 7                 | CEAS | SAGUNTO-CEA | Valencia  | 39°37'58.95"N 0°16'0.11"W  | SUB                 | IND               | COA  | X                                         |     | X    | X  |    | X   | X       |
| 8                 | CEME | BUÑOL-CEME  | Valencia  | 39°25'35.10"N 0°47'22.70"W | SUB                 | IND               | INN  | X                                         |     | X    | X  | X  | X   | X       |
| 9                 | FRAN | AV.FRANCIA  | Valencia  | 39°27'26.96"N 0°20'33.84"W | URB                 | TRA               | COA  | X                                         |     | X    | X  | X  |     | X       |
| 10                | LACY | ELDA-LACY   | Alicante  | 38°26'43.48"N 0°48'21.84"W | SUB                 | BK                | INN  | X                                         |     |      |    |    |     |         |
| 11                | MOLI | MOLI        | Valencia  | 39°28'52.05"N 0°24'30.51"W | SUB                 | TRA               | COA  | X                                         |     |      |    |    |     |         |
| 12                | PNAT | PATRONAT    | Castellon | 39°59'19.30"N 0°1'35.29"W  | URB                 | TRA               | COA  |                                           | X   |      |    |    |     |         |
| 13                | PENY | PEÑETA      | Castellon | 40°0'46.44"N 0°3'29.29"W   | SUB                 | IND               | COA  | X                                         |     | X    | X  | X  | X   | X       |
| 14                | PIST | P.SILLA     | Valencia  | 39°27'29.05"N 0°22'36.12"W | URB                 | TRA               | COA  | X                                         | X   |      |    |    |     |         |
| 15                | PLA  | PLA         | Alicante  | 38°21'30.60"N 0°28'15.96"W | URB                 | TRA               | COA  |                                           | X   |      |    |    |     |         |
| 16                | POLI | POLITECNIC  | Valencia  | 39°28'46.73"N 0°20'14.51"W | SUB                 | BK                | COA  | X                                         |     |      |    |    |     |         |
| 17                | RABA | RABASA      | Alicante  | 38°22'3.75"N 0°30'50.05"W  | SUB                 | IND               | COA  | X                                         |     | X    | X  | X  | X   | X       |
| 18                | TARO | ALBALAT     | Valencia  | 39°42'18.39"N 0°20'10.27"W | SUB                 | IND               | COA  | X                                         |     | X    | X  | X  | X   | X       |
| 19                | VILL | VILLAR      | Valencia  | 39°42'28.96"N 0°49'54.98"W | RUR                 | BK                | INN  | X                                         |     | X    | X  | X  | X   | X       |
| 20                | VVER | VIVER       | Castellon | 39°55'35.04"N 0°36'11.57"W | SUB                 | BK                | INN  | X                                         |     |      |    |    |     |         |
| 21                | ZORI | ZORITA      | Castellon | 40°43'59.16"N 0°10'12.86"W | RUR                 | BK                | INN  | X                                         |     | X    | X  | X  | X   | X       |

**Table S2.** Statistics of PM<sub>10</sub> data set of each Air Quality cabin during reference and lockdown periods and their percentage variation. Values showed in  $\mu\text{g}\cdot\text{m}^{-3}$ .

| PM <sub>10</sub>       |                 | Reference Period |      |      |        |      |      |      |      | Lockdown Period |      |     |        |      |      |     |      | % variation |
|------------------------|-----------------|------------------|------|------|--------|------|------|------|------|-----------------|------|-----|--------|------|------|-----|------|-------------|
| Station<br>NUM-<br>BER | Station<br>NAME | n                | MEAN | SD   | MEDIAN | P25  | P75  | MIN  | MAX  | n               | MEAN | SD  | MEDIAN | P25  | P75  | MIN | MAX  |             |
| 1                      | ALC2            | 236              | 23.9 | 10.0 | 22.5   | 17.0 | 29.0 | 10.0 | 70.0 | 41              | 14.5 | 3.6 | 14.0   | 12.5 | 16.5 | 5.0 | 25.0 | -39.4       |
| 2                      | ALGA            | 235              | 7.3  | 4.1  | 7.0    | 4.0  | 10.0 | 1.0  | 20.0 | 36              | 5.4  | 2.8 | 5.5    | 3.0  | 8.0  | 1.0 | 10.0 | -26.0       |
| 3                      | ALM2            | 229              | 8.9  | 6.9  | 7.0    | 4.0  | 12.0 | 1.0  | 46.0 | 41              | 5.6  | 2.7 | 5.0    | 3.0  | 8.0  | 1.0 | 11.0 | -37.0       |
| 4                      | BENC            | 251              | 7.9  | 5.2  | 6.0    | 4.0  | 11.0 | 1.0  | 33.0 | 41              | 5.7  | 2.2 | 5.0    | 4.0  | 7.0  | 1.0 | 12.0 | -28.1       |
| 5                      | BURR            | 238              | 8.0  | 4.7  | 7.0    | 4.0  | 10.0 | 1.0  | 25.0 | 43              | 7.0  | 3.6 | 6.0    | 4.0  | 10.0 | 1.0 | 14.0 | -12.4       |
| 6                      | CAUD            | 248              | 9.4  | 6.9  | 8.0    | 4.0  | 14.0 | 1.0  | 32.0 | 40              | 6.8  | 4.5 | 6.0    | 2.3  | 9.0  | 1.0 | 16.0 | -27.1       |
| 7                      | CEAS            | 246              | 8.2  | 4.9  | 7.0    | 4.0  | 12.0 | 1.0  | 22.0 | 43              | 10.9 | 4.8 | 11.0   | 6.0  | 15.0 | 3.0 | 20.0 | 32.9        |
| 8                      | CEME            | 251              | 7.8  | 5.3  | 7.0    | 4.0  | 10.0 | 1.0  | 27.0 | 40              | 10.2 | 6.0 | 9.0    | 4.0  | 16.0 | 2.0 | 22.0 | 30.3        |
| 9                      | FRAN            | 139              | 16.4 | 8.4  | 15.0   | 10.0 | 21.0 | 4.0  | 41.0 | 43              | 8.6  | 3.9 | 7.0    | 6.0  | 12.0 | 3.0 | 20.0 | -47.3       |
| 10                     | LACY            | 241              | 9.9  | 5.8  | 9.0    | 6.0  | 13.0 | 1.0  | 31.0 | 42              | 9.6  | 4.4 | 10.0   | 5.0  | 13.0 | 3.0 | 18.0 | -3.0        |
| 11                     | MOLI            | 248              | 13.4 | 8.2  | 11.0   | 7.0  | 17.0 | 3.0  | 42.0 | 43              | 13.2 | 8.7 | 10.0   | 6.0  | 22.0 | 3.0 | 32.0 | -1.6        |
| 13                     | PENY            | 247              | 7.9  | 5.3  | 7.0    | 4.0  | 11.0 | 1.0  | 27.0 | 43              | 9.0  | 4.3 | 9.0    | 5.0  | 13.0 | 2.0 | 18.0 | 13.6        |
| 14                     | PIST            | 248              | 22.0 | 13.9 | 18.5   | 12.0 | 28.8 | 2.0  | 92.0 | 42              | 8.2  | 4.8 | 8.5    | 4.0  | 12.0 | 1.0 | 20.0 | -62.7       |
| 16                     | POLI            | 244              | 13.8 | 7.7  | 13.0   | 8.0  | 17.0 | 3.0  | 42.0 | 43              | 11.3 | 5.7 | 10.0   | 7.0  | 16.0 | 3.0 | 25.0 | -18.0       |
| 17                     | RABA            | 242              | 10.2 | 6.9  | 9.0    | 6.0  | 12.3 | 2.0  | 56.0 | 41              | 11.9 | 3.9 | 12.0   | 9.0  | 14.5 | 3.0 | 20.0 | 17.2        |
| 18                     | TARO            | 248              | 6.0  | 4.0  | 5.0    | 3.0  | 8.0  | 1.0  | 23.0 | 26              | 5.7  | 2.8 | 6.0    | 3.0  | 8.3  | 1.0 | 10.0 | -5.1        |
| 19                     | VILL            | 250              | 12.0 | 8.1  | 11.0   | 5.0  | 17.0 | 1.0  | 43.0 | 41              | 13.5 | 6.5 | 13.0   | 7.5  | 20.0 | 4.0 | 26.0 | 12.8        |
| 20                     | VVER            | 252              | 8.5  | 5.0  | 8.0    | 4.0  | 12.0 | 0.0  | 32.0 | 43              | 7.7  | 3.9 | 7.0    | 4.0  | 10.0 | 2.0 | 15.0 | -9.0        |
| 21                     | ZORI            | 252              | 7.8  | 4.7  | 7.0    | 4.0  | 11.0 | 1.0  | 30.0 | 37              | 5.2  | 4.8 | 3.0    | 2.0  | 5.5  | 1.0 | 18.0 | -32.7       |

**Table S3.** Statistics of PM<sub>2.5</sub> data set of each Air Quality cabin during reference and lockdown periods and their percentage variation. Values showed in  $\mu\text{g}\cdot\text{m}^{-3}$ .

| PM <sub>2.5</sub> |                 | Reference Period |      |     |        |     |      |     |      | Lockdown Period |      |     |        |     |      |     |      | % variation |
|-------------------|-----------------|------------------|------|-----|--------|-----|------|-----|------|-----------------|------|-----|--------|-----|------|-----|------|-------------|
| Station<br>NUMBER | Station<br>NAME | n                | MEAN | SD  | MEDIAN | P25 | P75  | MIN | MAX  | n               | MEAN | SD  | MEDIAN | P25 | P75  | MIN | MAX  |             |
| 1                 | ALC2            | 239              | 6.1  | 3.8 | 5.0    | 4.0 | 7.0  | 1.0 | 30.0 | 41              | 5.5  | 1.4 | 6.0    | 4.5 | 6.0  | 2.0 | 9.0  | -10.4       |
| 2                 | ALGA            | 235              | 5.3  | 3.7 | 4.0    | 2.0 | 8.0  | 1.0 | 17.0 | 36              | 4.6  | 2.8 | 5.0    | 2.0 | 7.0  | 1.0 | 9.0  | -13.2       |
| 3                 | ALM2            | 229              | 5.3  | 3.4 | 5.0    | 3.0 | 7.0  | 1.0 | 22.0 | 41              | 4.8  | 2.6 | 5.0    | 2.0 | 7.0  | 1.0 | 11.0 | -9.6        |
| 4                 | BENC            | 251              | 4.9  | 3.8 | 4.0    | 2.0 | 6.0  | 1.0 | 28.0 | 41              | 4.5  | 2.0 | 4.0    | 3.0 | 6.0  | 1.0 | 10.0 | -9.3        |
| 5                 | BURR            | 238              | 6.3  | 3.8 | 6.0    | 3.0 | 8.0  | 1.0 | 21.0 | 43              | 5.9  | 3.2 | 5.0    | 4.0 | 9.0  | 1.0 | 12.0 | -6.4        |
| 6                 | CAUD            | 248              | 6.6  | 4.9 | 5.0    | 3.0 | 10.0 | 1.0 | 23.0 | 40              | 5.5  | 3.7 | 4.5    | 2.0 | 7.0  | 1.0 | 14.0 | -16.8       |
| 7                 | CEA_            | 246              | 5.9  | 4.1 | 5.0    | 3.0 | 8.0  | 1.0 | 21.0 | 43              | 8.5  | 4.6 | 9.0    | 4.0 | 12.0 | 2.0 | 17.0 | 44.8        |
| 8                 | CEME            | 251              | 5.3  | 3.8 | 4.0    | 2.0 | 7.0  | 1.0 | 19.0 | 40              | 7.7  | 4.5 | 7.5    | 3.0 | 12.8 | 2.0 | 16.0 | 43.7        |
| 9                 | FRAN            | 139              | 10.7 | 5.7 | 10.0   | 6.0 | 14.0 | 2.0 | 28.0 | 43              | 6.0  | 2.9 | 5.0    | 3.0 | 8.0  | 2.0 | 14.0 | -44.2       |
| 10                | LACY            | 241              | 6.6  | 4.6 | 6.0    | 3.0 | 9.0  | 1.0 | 26.0 | 42              | 8.0  | 4.3 | 8.0    | 4.0 | 11.0 | 2.0 | 16.0 | 21.7        |
| 11                | MOLI            | 248              | 11.6 | 7.7 | 9.0    | 6.0 | 16.0 | 2.0 | 38.0 | 43              | 12.1 | 8.5 | 9.0    | 5.0 | 21.0 | 3.0 | 31.0 | 5.0         |
| 13                | PENY            | 247              | 5.9  | 4.3 | 5.0    | 3.0 | 8.0  | 1.0 | 21.0 | 43              | 7.3  | 4.1 | 7.0    | 3.0 | 11.0 | 1.0 | 16.0 | 24.1        |
| 14                | PIST            | 248              | 10.3 | 6.7 | 9.0    | 5.0 | 13.0 | 1.0 | 42.0 | 42              | 6.5  | 4.7 | 7.0    | 2.0 | 10.3 | 1.0 | 18.0 | -36.2       |
| 16                | POLI            | 244              | 9.1  | 5.5 | 8.0    | 5.0 | 12.0 | 1.0 | 27.0 | 43              | 9.9  | 6.0 | 9.0    | 4.0 | 15.0 | 2.0 | 24.0 | 8.7         |
| 17                | RABA            | 242              | 4.9  | 3.4 | 4.0    | 3.0 | 6.0  | 1.0 | 22.0 | 41              | 5.5  | 2.7 | 5.0    | 3.0 | 7.5  | 1.0 | 11.0 | 12.2        |
| 18                | TARO            | 248              | 3.5  | 2.5 | 3.0    | 2.0 | 5.0  | 1.0 | 12.0 | 26              | 4.7  | 2.5 | 5.0    | 2.0 | 7.0  | 1.0 | 8.0  | 33.8        |
| 19                | VILL            | 250              | 6.6  | 4.9 | 5.0    | 3.0 | 9.0  | 1.0 | 22.0 | 41              | 8.8  | 5.7 | 7.0    | 3.0 | 14.0 | 2.0 | 19.0 | 33.2        |
| 20                | VVER            | 252              | 5.6  | 3.8 | 4.5    | 2.0 | 8.0  | 0.0 | 21.0 | 43              | 6.4  | 3.8 | 6.0    | 3.0 | 9.0  | 1.0 | 13.0 | 14.9        |
| 21                | ZORI            | 252              | 5.3  | 3.7 | 4.0    | 2.0 | 7.0  | 1.0 | 23.0 | 37              | 3.9  | 3.0 | 3.0    | 1.0 | 5.0  | 1.0 | 11.0 | -25.3       |

**Table S4.** Overall mean, standard deviation (Sd), median, 5th and 95th percentiles (P05 and P95), minimum (Min) and maximum (Max) values for PM<sub>10</sub>, PM<sub>2.5</sub> and BTX for reference and lockdown periods considering all the AQCs in this study. Values expressed in  $\mu\text{g}\cdot\text{m}^{-3}$ .

|        | Reference period (2015-2019) |       |         |         |         | Lockdown period (2020) |       |         |         |         |
|--------|------------------------------|-------|---------|---------|---------|------------------------|-------|---------|---------|---------|
|        | PM10                         | PM2.5 | Benzene | Toluene | Xylenes | PM10                   | PM2.5 | Benzene | Toluene | Xylenes |
| Mean   | 10.9                         | 6.5   | 1.6     | 3.9     | 2.2     | 9.1                    | 6.7   | 0.4     | 1.7     | 0.8     |
| SD     | 8.5                          | 5.0   | 1.2     | 3.2     | 2.3     | 5.5                    | 4.7   | 0.3     | 1.2     | 0.7     |
| Median | 9.0                          | 5.0   | 1.3     | 3.0     | 1.6     | 8.0                    | 6.0   | 0.3     | 1.4     | 0.7     |
| P05    | 2.0                          | 1.0   | 0.4     | 0.7     | 0.2     | 2.0                    | 1.0   | 0.1     | 0.4     | 0.2     |
| P95    | 27.0                         | 16.0  | 3.6     | 10.5    | 6.8     | 19.0                   | 15.0  | 0.8     | 3.9     | 2.4     |
| Min    | 0.0                          | 0.0   | 0.1     | 0.1     | 0.0     | 1.0                    | 1.0   | 0.1     | 0.3     | 0.0     |
| Max    | 92.0                         | 42.0  | 9.0     | 23.4    | 18.1    | 32.0                   | 31.0  | 3.2     | 5.7     | 4.3     |

**Table S5.** Mean PM concentrations and standard deviations for all Air Quality Cabins and grouped by type of environment and emission for both periods of study and PM percentage variation during lockdown compared to the reference period. Values shown in  $\mu\text{g}\cdot\text{m}^{-3}$ .

|         | Reference Period |      |                   |     | Lock-down period |     |                   |     | % Variation      |                   |
|---------|------------------|------|-------------------|-----|------------------|-----|-------------------|-----|------------------|-------------------|
|         | PM <sub>10</sub> |      | PM <sub>2.5</sub> |     | PM <sub>10</sub> |     | PM <sub>2.5</sub> |     | PM <sub>10</sub> | PM <sub>2.5</sub> |
|         | MEAN             | SD   | MEAN              | SD  | MEAN             | SD  | MEAN              | SD  | MEAN             | SD                |
| ALL     | 10.9             | 8.5  | 6.5               | 5.0 | 9.1              | 5.5 | 6.7               | 4.7 | -16.5            | 3.1               |
| URB     | 18.1             | 12.0 | 7.8               | 5.6 | 9.2              | 5.0 | 5.7               | 3.2 | -49.0            | -27.3             |
| SUB     | 9.3              | 6.4  | 6.3               | 5.1 | 9.7              | 5.5 | 7.6               | 5.2 | 3.6              | 20.2              |
| RURAL   | 8.9              | 6.2  | 6.0               | 4.3 | 7.7              | 5.5 | 5.8               | 4.2 | -13.6            | -3.4              |
| TRAFFIC | 17.4             | 11.5 | 10.9              | 6.9 | 10.0             | 6.5 | 8.2               | 6.4 | -42.4            | -24.3             |
| IND     | 9.8              | 7.9  | 5.3               | 3.8 | 9.1              | 4.9 | 6.1               | 3.5 | -7.5             | 14.3              |
| BK      | 9.8              | 6.6  | 6.4               | 4.7 | 8.6              | 5.5 | 6.9               | 4.8 | -11.9            | 6.4               |

**Table S6.** Statistical summary of environmental parameters of each Air Quality cabin during reference and lockdown periods.

|                  |               | Reference Period |     |        |      |           |            |          |               | Lockdown Period |      |        |      |           |            |          |               |     |      |
|------------------|---------------|------------------|-----|--------|------|-----------|------------|----------|---------------|-----------------|------|--------|------|-----------|------------|----------|---------------|-----|------|
|                  |               | TEMP (°C)        |     | RH (%) |      | RF (L/m2) | RAD (W/m2) | WS (m/s) | WD (De-grees) | TEMP (°C)       |      | RH (%) |      | RF (L/m2) | RAD (W/m2) | WS (m/s) | WD (De-grees) |     |      |
| STA-TION NUM-BER | STA-TION NAME | MEAN             | SD  | MEAN   | SD   | SUM       | MEAN       | MEAN     | SD            | MEAN            | MEAN | SD     | MEAN | SD        | SUM        | MEAN     | MEAN          | SD  | MEAN |
| 1                | ALC2          | 11.1             | 4.7 | 68.4   | 16.6 | 18.6      | 194.3      | 4.0      | 1.9           | 296             | 11.7 | 4.3    | 73.6 | 13.0      | 78.4       | 163.4    | 1.5           | 0.7 | 67   |
| 3                | ALM2          | -                | -   | -      | -    | -         | -          | 0.9      | 0.4           | 128             | -    | -      | -    | -         | -          | -        | 1.5           | 0.6 | 86   |
| 5                | BURR          | 16.6             | 2.7 | 68.2   | 11.5 | 6.1       | 232.7      | 1.4      | 0.8           | 130             | 17.1 | 3.4    | 77.0 | 11.5      | 38.9       | 187.7    | 1.1           | 0.6 | 94   |
| 7                | CEAS          | 16.4             | 2.8 | 64.5   | 12.7 | 0.0       | 250.6      | 1.6      | 0.8           | 42              | 16.2 | 3.3    | 77.2 | 11.7      | 0          | 223.7    | 0.9           | 0.4 | 40   |
| 8                | CEME          | 14.3             | 3.7 | 59.4   | 13.8 | 19.7      | 229.5      | 2.3      | 1.6           | 343             | 13.5 | 3.7    | 75.7 | 11.7      | 22.3       | 157.5    | 1.1           | 0.4 | 58   |
| 9                | FRAN          | 16.8             | 2.8 | 57.6   | 12.5 | 36.0      | -          | 1.5      | 0.9           | 105             | 17.7 | 3.4    | 75.1 | 12.4      | 15         | -        | 1.3           | 0.5 | 91   |
| 13               | PENY          | 16.7             | 2.8 | 76.6   | 12.8 | 10.7      | 222.8      | 1.3      | 0.6           | 107             | 17.1 | 3.3    | 89.2 | 7.8       | 50.2       | 180.3    | 1.8           | 1.1 | 82   |
| 17               | RABA          | 16.9             | 2.9 | 64.1   | 13.6 | 2.8       | 250.4      | 1.7      | 1.4           | 91              | 15.9 | 3.3    | 73.6 | 12.7      | 16.3       | 187.7    | 0.9           | 0.5 | 39   |
| 18               | TARO          | 14.8             | 3.2 | 56.4   | 14.4 | 14.2      | 230.6      | 1.3      | 1.0           | 105             | 14.5 | 3.7    | 71.2 | 12.6      | 31.5       | 184.9    | 1.0           | 0.6 | 93   |
| 19               | VILL          | 14.2             | 3.5 | 55.7   | 13.8 | 9.9       | 233.0      | 2.8      | 1.9           | 180             | 14.0 | 3.9    | 74.1 | 13.0      | 12.3       | 160.0    | 1.5           | 0.8 | 134  |
| 21               | ZORI          | 11.8             | 3.7 | 62.7   | 11.1 | 16.1      | 212.4      | 1.8      | 1.1           | 358             | 12.2 | 3.9    | 75.6 | 11.0      | 34.4       | 186.4    | 1.6           | 1.5 | 31   |
|                  | ALL           | 14.74            | 3.9 | 62.1   | 14.4 | 134.1*    | 234.3      | 1.9      | 1.5           | 84              | 14.7 | 4.1    | 74.9 | 13.2      | 299.3*     | 185.3    | 1.6           | 1.1 | 74   |

**Table S7.** Pearson's correlation coefficient, R, between PM<sub>10</sub> and PM<sub>2.5</sub> and meteorological variables. Cells with  $R > |0.5|$  are marked in pink

|                   |      | ZORI    | ALC2    | PENY    | ALM2    | BURR    | TARO    | CEAS    | VILL    | FRAN    | CEME    | RABA    |
|-------------------|------|---------|---------|---------|---------|---------|---------|---------|---------|---------|---------|---------|
| PM <sub>10</sub>  | HR   | 0.1477  | −0.0055 | 0.4864  | NaN     | 0.3252  | 0.2579  | 0.4149  | 0.3760  | 0.1529  | 0.5922  | −0.4625 |
|                   | PLU  | −0.1161 | −0.1034 | −0.3113 | NaN     | −0.1247 | −0.5148 | NaN     | −0.0183 | 0.0102  | 0.1428  | −0.2851 |
|                   | RAD  | −0.2757 | 0.0767  | −0.1882 | NaN     | −0.1340 | −0.082  | −0.1767 | −0.1343 | NaN     | −0.4020 | 0.2496  |
|                   | WIND | −0.0281 | NaN     | −0.5272 | −0.5845 | −0.6839 | NaN     | −0.5846 | −0.6555 | NaN     | −0.6651 | 0.2403  |
|                   | TEMP | −0.6788 | 0.1275  | −0.2519 | NaN     | −0.2334 | −0.2361 | −0.3012 | −0.2809 | −0.1403 | −0.4515 | 0.4918  |
| PM <sub>2.5</sub> | HR   | 0.0314  | −0.2307 | 0.5804  | NaN     | 0.3274  | 0.2666  | 0.481   | 0.3614  | 0.3132  | 0.503   | 0.393   |
|                   | PLU  | −0.2141 | −0.2352 | −0.2307 | NaN     | −0.1402 | −0.4527 | NaN     | −0.1341 | 0.0587  | 0.1489  | −0.0829 |
|                   | RAD  | −0.2405 | 0.1326  | −0.2171 | NaN     | −0.1273 | −0.1423 | −0.2461 | −0.0968 | NaN     | −0.3274 | −0.2435 |
|                   | WIND | −0.0067 | NaN     | −0.4864 | −0.6428 | −0.6931 | NaN     | −0.6321 | −0.6626 | NaN     | −0.6854 | −0.4927 |
|                   | TEMP | −0.6838 | 0.1357  | −0.3424 | NaN     | −0.2471 | −0.3325 | −0.4119 | −0.3579 | −0.2742 | −0.4567 | −0.4196 |

**Table S8.** P-values between PM<sub>10</sub> and PM<sub>2.5</sub> and meteorological variables. Cells with p-value < 0.05 are marked in pink.

|                   |      | ZORI  | ALC2  | PENY  | ALM2  | BURR  | TARO  | CEAS  | VILL  | FRAN  | CEME  | RABA  |
|-------------------|------|-------|-------|-------|-------|-------|-------|-------|-------|-------|-------|-------|
| PM <sub>10</sub>  | HR   | 0.383 | 0.976 | 0.001 | NaN   | 0.038 | 0.213 | 0.006 | 0.017 | 0.328 | 0.000 | 0.002 |
|                   | PLU  | 0.494 | 0.525 | 0.042 | NaN   | 0.426 | 0.012 | NaN   | 0.927 | 0.948 | 0.380 | 0.071 |
|                   | RAD  | 0.099 | 0.638 | 0.227 | NaN   | 0.404 | 0.690 | 0.269 | 0.403 | NaN   | 0.010 | 0.116 |
|                   | WIND | 0.869 | NaN   | 0.000 | 0.000 | 0.000 | NaN   | 0.000 | 0.000 | NaN   | 0.000 | 0.130 |
|                   | TEMP | 0.000 | 0.433 | 0.103 | NaN   | 0.142 | 0.246 | 0.050 | 0.075 | 0.370 | 0.004 | 0.001 |
| PM <sub>2.5</sub> | HR   | 0.854 | 0.196 | 0.000 | NaN   | 0.037 | 0.198 | 0.001 | 0.022 | 0.041 | 0.001 | 0.011 |
|                   | PLU  | 0.203 | 0.144 | 0.137 | NaN   | 0.370 | 0.030 | NaN   | 0.496 | 0.709 | 0.359 | 0.606 |
|                   | RAD  | 0.152 | 0.415 | 0.162 | NaN   | 0.428 | 0.488 | 0.121 | 0.547 | NaN   | 0.039 | 0.125 |
|                   | WIND | 0.969 | NaN   | 0.001 | 0.000 | 0.000 | NaN   | 0.000 | 0.000 | NaN   | 0.000 | 0.001 |
|                   | TEMP | 0.000 | 0.404 | 0.025 | NaN   | 0.119 | 0.097 | 0.006 | 0.022 | 0.075 | 0.003 | 0.006 |

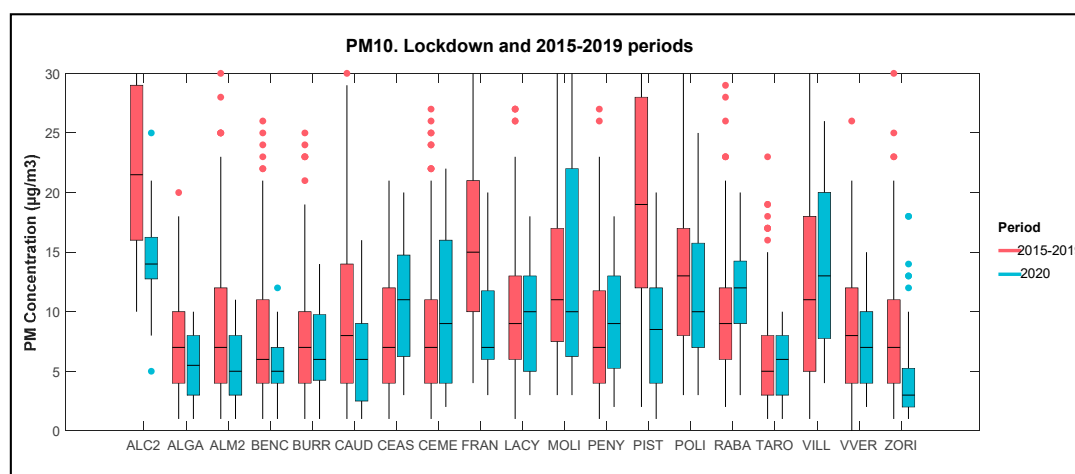

a

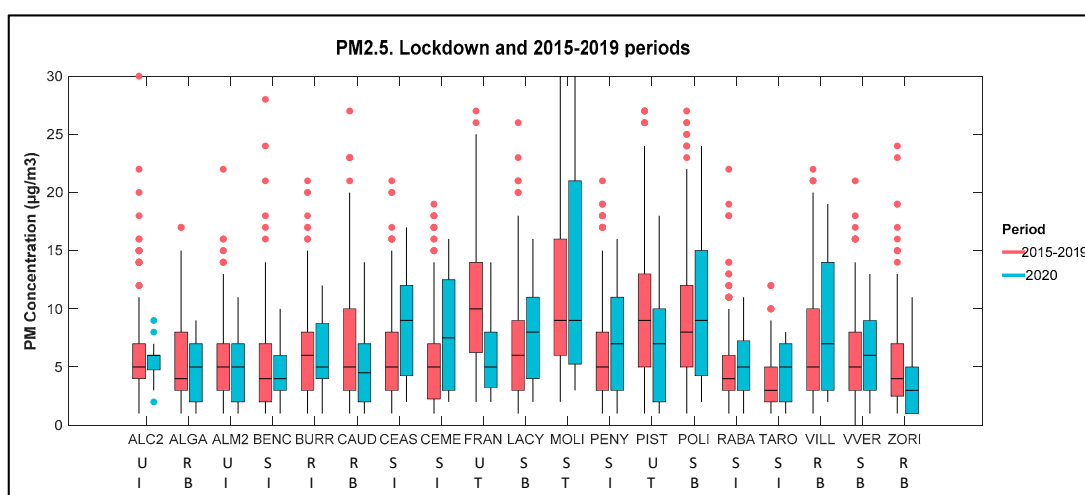

b

**Figure S1.** Box plot of a) PM<sub>10</sub> and b) PM<sub>2.5</sub> concentration in the AQCs for reference and lockdown periods. The marker inside the box plot is the median, and lower and upper box boundaries are the 25th (Q1) and 75th (Q3) percentiles, respectively. Lower and upper whiskers represent Q1 - 1.5·IQR and Q3 + 1.5·IQR, respectively. Dots are outliers. Codes below ACQ names refer to their type of environment, U: urban, S: suburban, R: rural; and type of environment, T: traffic, I: industrial, B: background.

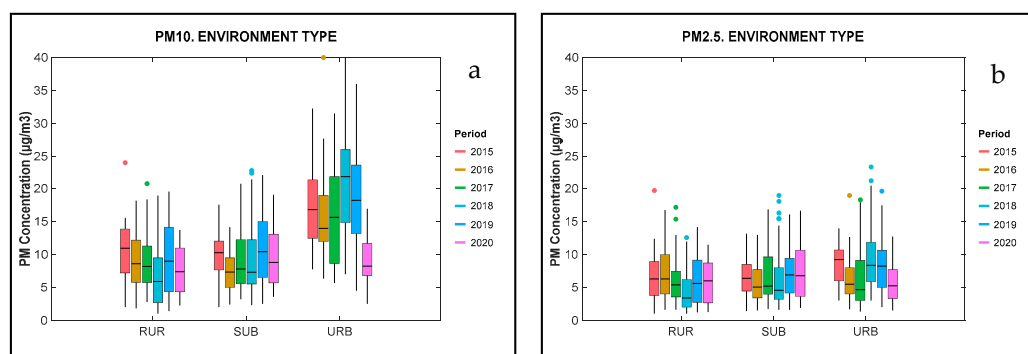

**Figure S2.** a) b) Box plots by environment type. a) and b) represent PM<sub>10</sub> and PM<sub>2.5</sub> respectively in the reference, sorted by year, and the lockdown periods. The marker inside the boxplot is the median, and lower and upper box boundaries are the 25th (Q1) and 75th (Q3) percentiles, respectively. Lower and upper whiskers represent Q1 - 1.5·IQR and Q3 + 1.5·IQR, respectively. Dots are outliers.



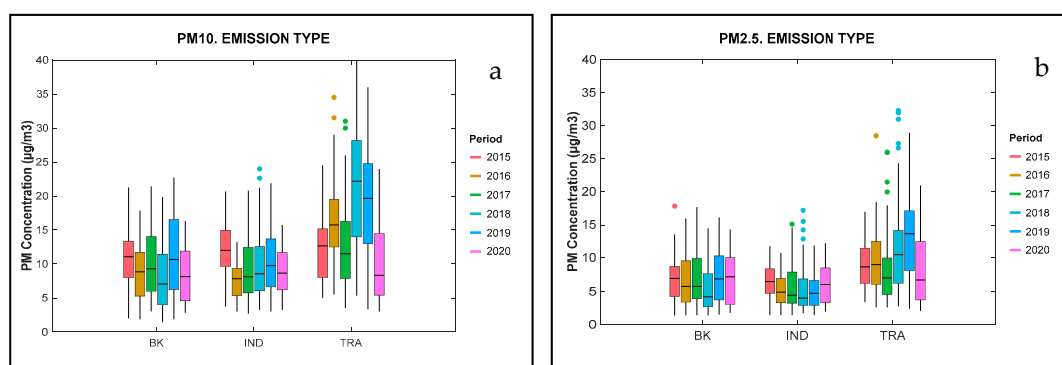

**Figure S3.** a) b) Box plots by emission type. a) and b) represent  $PM_{10}$  and  $PM_{2.5}$  respectively in the reference, sorted by year, and the lockdown periods. The marker inside the box plot is the median, and lower and upper box boundaries are the 25th (Q1) and 75th (Q3) percentiles, respectively. Lower and upper whiskers represent  $Q1 - 1.5 \cdot IQR$  and  $Q3 + 1.5 \cdot IQR$ , respectively. Dots are outliers.

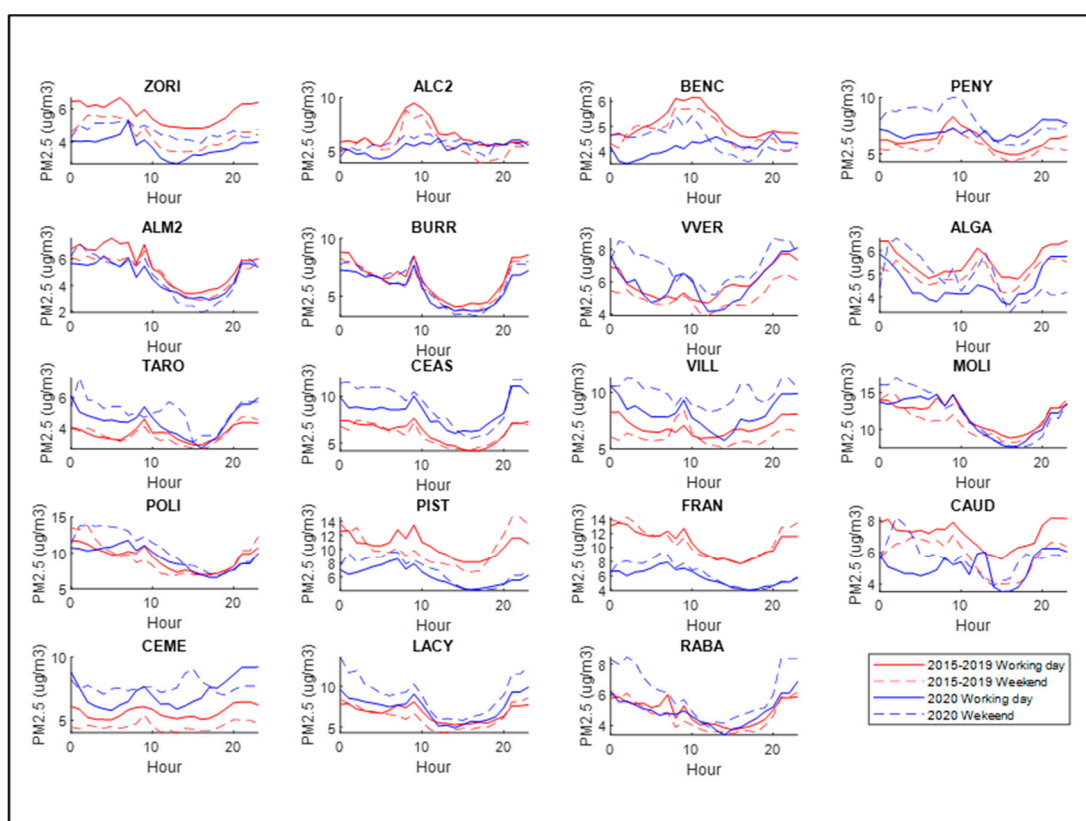

**Figure S4.** Hourly  $PM_{2.5}$  profile comparing reference and lockdown periods. Individual Y-axis upper limit of each AQC has been set according to maximum concentration.

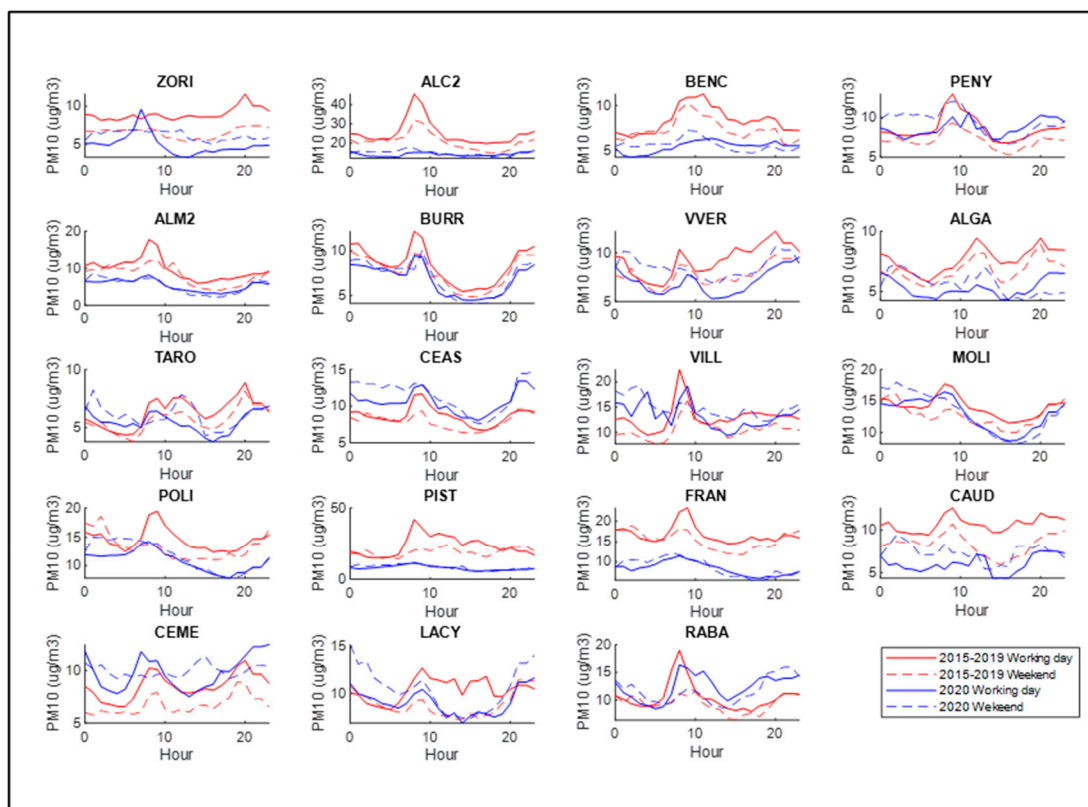

**Figure S5.** Hourly PM<sub>10</sub> profile comparing reference and lockdown periods. Individual Y-axis limit of each AQC has been set considering maximum concentration.

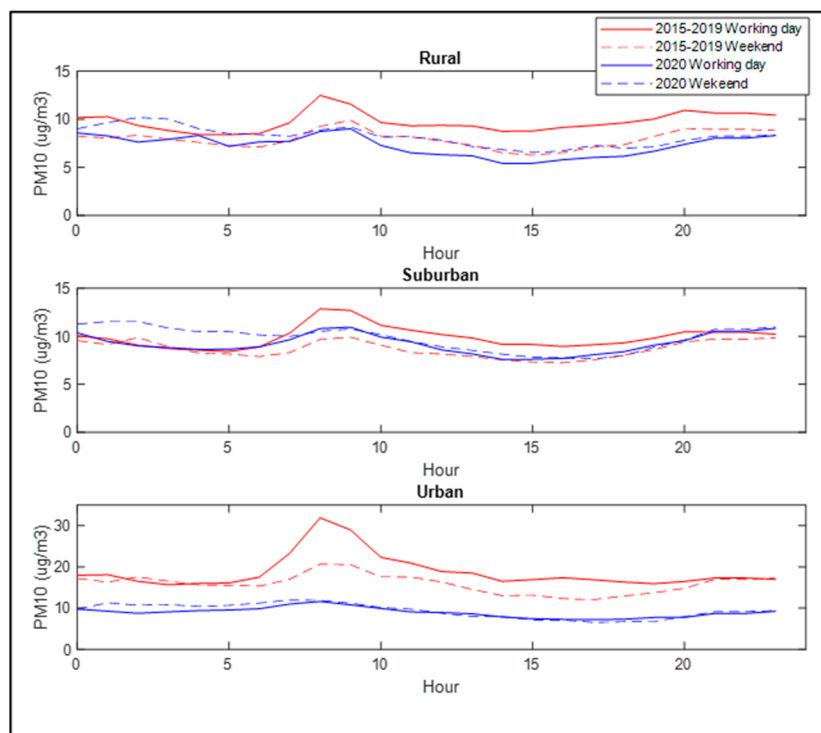

**Figure S6.** Hourly PM<sub>10</sub> concentration profile by environment type for reference and lockdown periods.

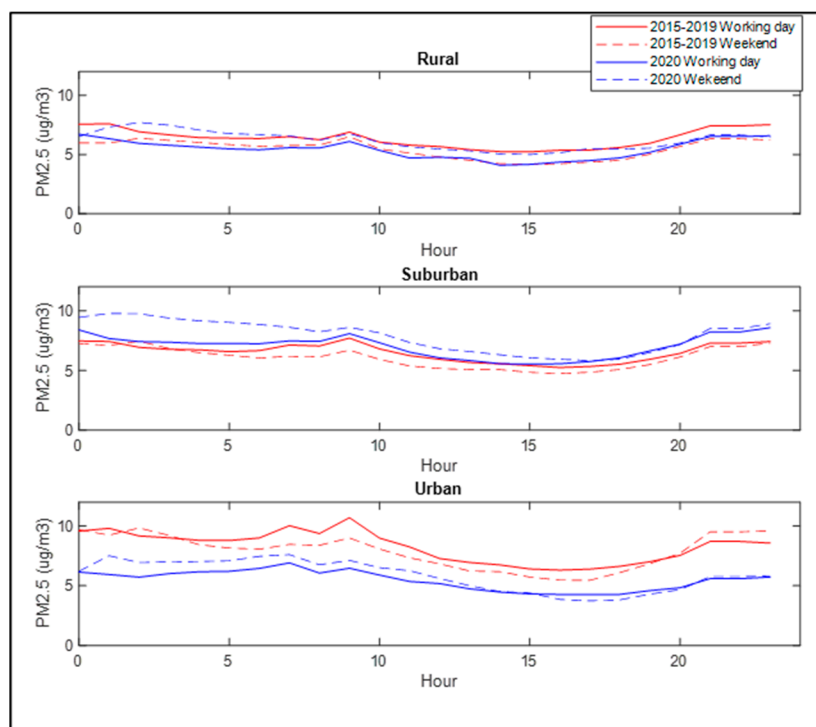

**Figure S7.** Hourly PM<sub>2.5</sub> concentration profile by environment type for reference and lockdown periods.

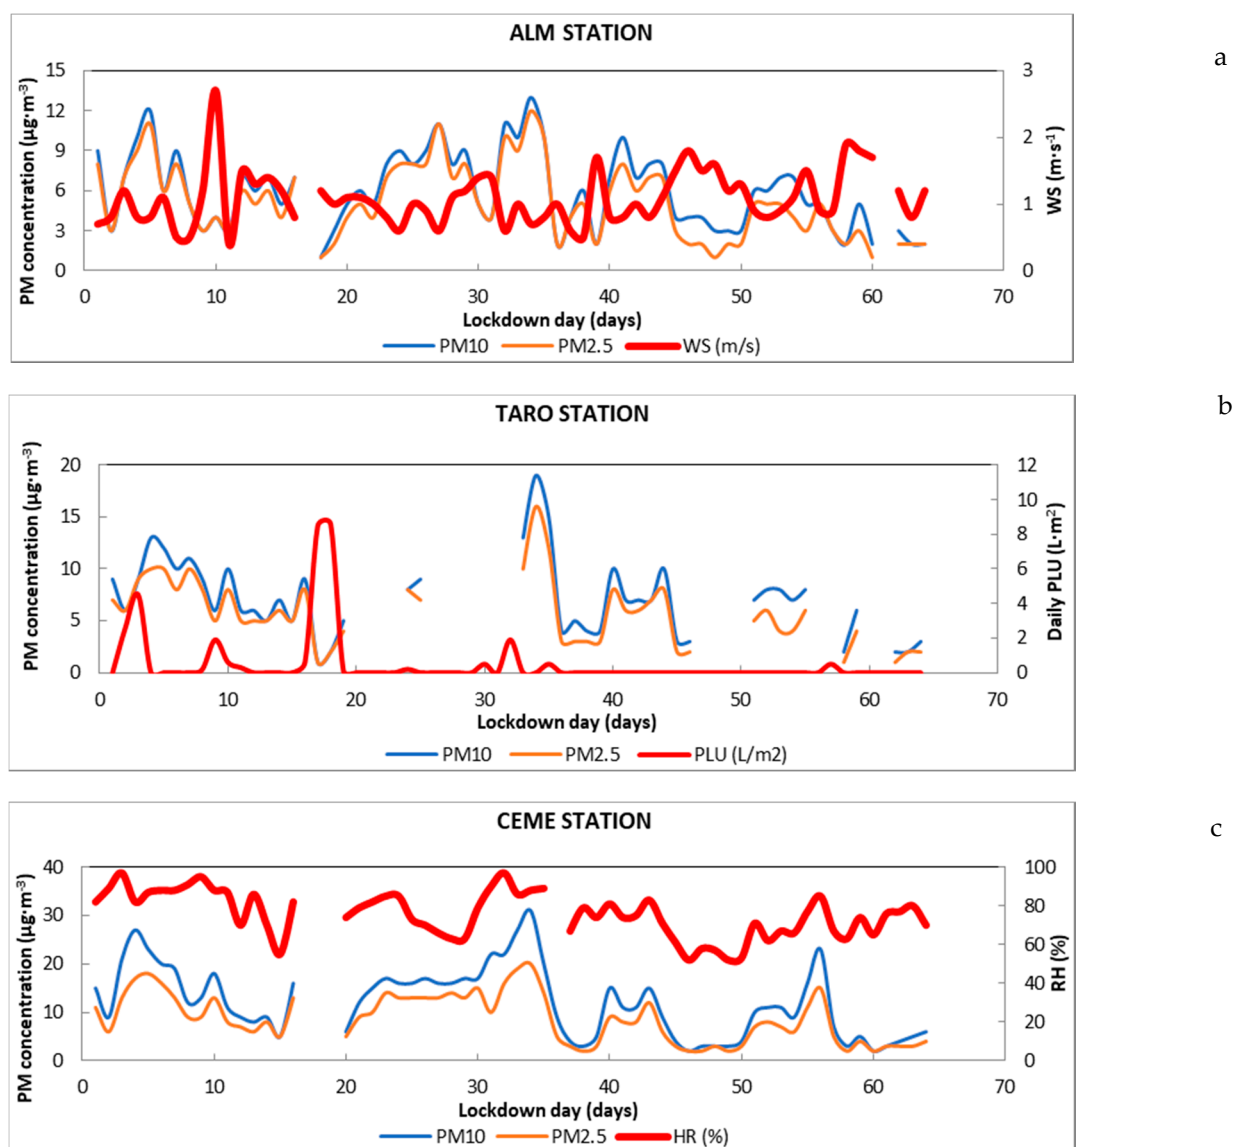

**Figure S8.** PM and meteorological variables time series to illustrate anticorrelation in a)ALM and b)TARO and correlation in c)CEME stations during lockdown.
